# Supplementary material for: The Prevalence, Indications, Outcomes of the Most Common Major Gynecological Surgeries in Kazakhstan and Recommendations for Potential Improvements into Public Health and Clinical Practice: Analysis of the National Electronic Healthcare System (2014–2019)
Source: MDPI journal article supplement (doi:10.3390/ijerph192214679), 2022-11-09
Supplement: s1 [file s1]

**Table S1.** Outcome of stay in relation to the main diagnosis.

| Diagnosis                                 | ICD 10 code | Alive N (%)      | Dead N (%)  | Total   |
|-------------------------------------------|-------------|------------------|-------------|---------|
| <b>Main Diagnosis</b>                     |             |                  |             |         |
| Ectopic pregnancy                         | O00         | 28,958 (99.99%)  | 4 (0.01%)   | 28,962  |
| Intramural leiomyoma of uterus            | D25.1       | 12,306 (99.85%)  | 18 (0.15%)  | 12,324  |
| Submucous leiomyoma of uterus             | D25.0       | 10,334 (99.88%)  | 12 (0.12%)  | 10,346  |
| Benign neoplasm of ovary                  | D27         | 5199 (99.71%)    | 15 (0.29%)  | 5214    |
| Single delivery by caesarean section      | O82         | 4958 (99.52%)    | 24 (0.48%)  | 4982    |
| Other benign neoplasm of corpus uteri     | D26.1       | 4617 (99.78%)    | 10 (0.22%)  | 4627    |
| Subserosal leiomyoma of uterus            | D25.2       | 4510 (99.91%)    | 4 (0.09%)   | 4514    |
| Other assisted single delivery            | N83         | 3724 (99.65%)    | 13 (0.35%)  | 3737    |
| Other maternal complications              | O99         | 3339 (98.87%)    | 38 (1.13%)  | 3377    |
| Malignant neoplasm of ovary               | C56         | 2760 (96.98%)    | 86 (3.02%)  | 2846    |
| Salpingitis and oophoritis                | N70         | 2532 (98.75%)    | 32 (1.25%)  | 2564    |
| Maternal care of pelvic organs            | O34         | 2168 (100%)      | 0 (0%)      | 2168    |
| Malignant neoplasm of endometrium         | C54.1       | 2127 (98.56%)    | 31 (1.44%)  | 2158    |
| Other female pelvic inflammatory diseases | N73         | 1896 (98.24%)    | 34 (1.76%)  | 1930    |
| Female genital prolapse                   | N81         | 974 (99.9%)      | 1 (0.1%)    | 975     |
| Malignant neoplasm of isthmus uteri       | C54.0       | 844 (97.57%)     | 21 (2.43%)  | 865     |
| Malignant neoplasm of endocervix          | C53.0       | 800 (99.88%)     | 1 (0.12%)   | 801     |
| Female infertility                        | N97         | 794 (100%)       | 0 (0%)      | 794     |
| Endometriosis                             | N80         | 759 (100%)       | 0 (0%)      | 759     |
| Single spontaneous delivery               | O80         | 709 (99.72%)     | 2 (0.28%)   | 711     |
| Total                                     |             | 104,216 (99.29%) | 742 (0.71%) | 104,958 |
| <b>Comorbidity</b>                        |             |                  |             |         |
| Iron deficiency anemia                    | D50         | 7517 (99.71%)    | 22 (0.29%)  | 7539    |
| Other maternal complications              | O99         | 4280 (99.3%)     | 30 (0.7%)   | 4310    |
| Other assisted single delivery            | N83         | 2786 (99.82%)    | 5 (0.18%)   | 2791    |
| Other female pelvic inflammatory diseases | N73         | 2587 (99.54%)    | 12 (0.46%)  | 2599    |
| Salpingitis and oophoritis                | N70         | 2430 (99.26%)    | 18 (0.74%)  | 2448    |
| Benign neoplasm of ovary                  | D27         | 2318 (99.83%)    | 4 (0.17%)   | 2322    |
| Essential (primary) hypertension          | I10         | 1930 (98.87%)    | 22 (1.13%)  | 1952    |
| Hypertensive heart disease                | I11         | 1475 (98.6%)     | 21 (1.4%)   | 1496    |
| Single delivery by caesarean section      | O82         | 1388 (99.57%)    | 6 (0.43%)   | 1394    |

|                                                                      |       |                 |             |        |
|----------------------------------------------------------------------|-------|-----------------|-------------|--------|
| Maternal care of pelvic organs                                       | O34   | 1336 (99.7%)    | 4 (0.3%)    | 1340   |
| Obesity                                                              | E66   | 1264 (99.61%)   | 5 (0.39%)   | 1269   |
| Supervision of high-risk pregnancy                                   | Z35   | 938 (99.89%)    | 1 (0.11%)   | 939    |
| Endometriosis                                                        | N80   | 865 (99.88%)    | 1 (0.12%)   | 866    |
| Erosion and ectropion of cervix uteri                                | N86   | 835 (100%)      | 0 (0%)      | 835    |
| Acute posthaemorrhagic anaemia                                       | D62   | 785 (98.99%)    | 8 (1.01%)   | 793    |
| Other disorders of peritoneum                                        | K66   | 715 (99.58%)    | 3 (0.42%)   | 718    |
| Other non-inflammatory disorders of uterus, except cervix            | N85   | 625 (99.68%)    | 2 (0.32%)   | 627    |
| Haemorrhage in early pregnancy                                       | O22   | 584 (99.49%)    | 3 (0.51%)   | 587    |
| Maternal care for other known or suspected fetal problems            | O36   | 573 (98.62%)    | 8 (1.38%)   | 581    |
| Other inflammation of vagina and vulva                               | N76   | 576 (99.31%)    | 4 (0.69%)   | 580    |
| Total                                                                |       | 54,469 (98.99%) | 557 (1.01%) | 55,026 |
| <b>Complication</b>                                                  |       |                 |             |        |
| Postpartum haemorrhage                                               | O72   | 771 (98.72%)    | 10 (1.28%)  | 781    |
| Other disorders of peritoneum                                        | K66   | 438 (100%)      | 0 (0%)      | 438    |
| Other female pelvic inflammatory diseases                            | N73   | 295 (98.99%)    | 3 (1.01%)   | 298    |
| Acute posthaemorrhagic anaemia                                       | D62   | 280 (99.29%)    | 2 (0.71%)   | 282    |
| Peritonitis                                                          | K65   | 184 (86.79%)    | 28 (13.21%) | 212    |
| Iron deficiency anaemia                                              | D50   | 173 (98.86%)    | 2 (1.14%)   | 175    |
| Premature separation of placenta with coagulation defect             | O45.0 | 154 (99.35%)    | 1 (0.65%)   | 155    |
| Maternal care of pelvic organs                                       | O34   | 146 (100%)      | 0 (0%)      | 146    |
| Other maternal complications                                         | O99   | 138 (97.87%)    | 3 (2.13%)   | 141    |
| Maternal care for other known or suspected fetal problems            | O36   | 120 (99.17%)    | 1 (0.83%)   | 121    |
| Shock, not elsewhere classified                                      | R57   | 105 (95.45%)    | 5 (4.55%)   | 110    |
| Shock following abortion and ectopic and molar pregnancy             | O08.3 | 105 (99.06%)    | 1 (0.94%)   | 106    |
| Other abnormal uterine and vaginal bleeding                          | N93   | 91 (100%)       | 0 (0%)      | 91     |
| Other obstetric trauma                                               | O71   | 85 (100%)       | 0 (0%)      | 85     |
| Placenta praevia with haemorrhage                                    | O44.1 | 82 (100%)       | 0 (0%)      | 82     |
| Pre-eclampsia                                                        | O14   | 74 (98.67%)     | 1 (1.33%)   | 75     |
| Other antepartum haemorrhage                                         | O45.8 | 75 (100%)       | 0 (0%)      | 75     |
| Excessive, frequent and irregular menstruation                       | N92   | 70 (100%)       | 0 (0%)      | 70     |
| Disseminated intravascular coagulation                               | D65   | 46 (82.14%)     | 10 (17.86%) | 56     |
| Other complications of labour and delivery, not elsewhere classified | O75   | 52 (94.55%)     | 3 (5.45%)   | 55     |
| Total                                                                |       | 4423 (95.18%)   | 224 (4.82%) | 4647   |

**Table S2.** Surgical procedures linked to the main diagnosis.

| Main Diagnosis (ICD-10)                                                                    | Surgeries (ICD-9) |       |       |       |       |      |       |        |      |      |       | Total  |
|--------------------------------------------------------------------------------------------|-------------------|-------|-------|-------|-------|------|-------|--------|------|------|-------|--------|
|                                                                                            | 65.3              | 65.51 | 65.53 | 65.61 | 65.62 | 66.4 | 66.51 | 66.62  | 68.3 | 68.4 | 68.61 |        |
| Ectopic pregnancy (O00)                                                                    | 178               | 2     | 0     | 12    | 367   | 3008 | 138   | 25,160 | 41   | 57   | 4     | 28,967 |
| Intramural leiomyoma of uterus (D25.1)                                                     | 38                | 6     | 1     | 401   | 25    | 147  | 336   | 12     | 4844 | 3005 | 3509  | 12,324 |
| Submucous leiomyoma of uterus (D25.0)                                                      | 46                | 5     | 4     | 233   | 15    | 98   | 153   | 0      | 4492 | 3093 | 2207  | 10,346 |
| Benign neoplasm of ovary (D27)                                                             | 857               | 158   | 121   | 642   | 502   | 271  | 93    | 15     | 802  | 1399 | 354   | 5214   |
| Single delivery by caesarean section (O82)                                                 | 175               | 0     | 0     | 3     | 73    | 51   | 52    | 0      | 2978 | 1483 | 7     | 4822   |
| Other benign neoplasm of corpus uteri (D26.1)                                              | 16                | 2     | 47    | 156   | 21    | 30   | 19    | 0      | 2798 | 910  | 628   | 4627   |
| Subserosal leiomyoma of uterus (D25.2)                                                     | 19                | 5     | 3     | 99    | 7     | 49   | 141   | 0      | 1488 | 806  | 1897  | 4514   |
| Other assisted single delivery (N83)                                                       | 1642              | 49    | 21    | 198   | 611   | 561  | 146   | 102    | 239  | 116  | 52    | 3737   |
| Other maternal complications (O99)                                                         | 19                | 5     | 0     | 0     | 12    | 6    | 3061  | 5      | 129  | 139  | 0     | 3376   |
| Malignant neoplasm of ovary (C56)                                                          | 103               | 82    | 7     | 109   | 55    | 14   | 3     | 0      | 224  | 2199 | 50    | 2846   |
| Salpingitis and oophoritis (N70)                                                           | 106               | 23    | 10    | 360   | 213   | 848  | 561   | 57     | 285  | 93   | 8     | 2564   |
| Maternal care of pelvic organs (O34)                                                       | 7                 | 3     | 0     | 0     | 0     | 3    | 1841  | 0      | 232  | 82   | 0     | 2168   |
| Malignant neoplasm of endometrium (C54.1)                                                  | 2                 | 1     | 0     | 5     | 4     | 0    | 3     | 0      | 29   | 1841 | 273   | 2158   |
| Other female pelvic inflammatory diseases (N73)                                            | 139               | 16    | 6     | 271   | 173   | 582  | 292   | 33     | 219  | 195  | 3     | 1929   |
| Labour and delivery complicated by intrapartum haemorrhage, not elsewhere classified (O67) | 10                | 0     | 0     | 7     | 7     | 1    | 0     | 0      | 652  | 484  | 3     | 1164   |

**Table S3.** Most common diagnoses with complications and comorbidities.

| ICD-10 (diagnosis)                                                                       | Main (N) | Complica-tion (N) | Comorbi-dity (N) |
|------------------------------------------------------------------------------------------|----------|-------------------|------------------|
| O00 (Ectopic pregnancy)                                                                  | 28967    | 8                 | 54               |
| D25 (Leiomyoma of uterus )                                                               | 27480    | 9                 | 636              |
| D25.1 (Intramur leiomyoma of uterus)                                                     | 12324    | 4                 | 248              |
| D25.0 (Submucousal leiomyoma of uterus)                                                  | 10346    | 4                 | 235              |
| D25.2 (Subserosal leiomyoma of uterus)                                                   | 4514     | 1                 | 111              |
| D25.9 (Leiomyoma of uterus, unspecified)                                                 | 296      | 0                 | 42               |
| D27 (Benign neoplasm of ovary)                                                           | 5214     | 17                | 2321             |
| O82 (Cesarean delivery without indication)                                               | 4822     | 10                | 1394             |
| D26.1 (Other benign neoplasm of corpus uteri)                                            | 4627     | 3                 | 191              |
| N83 (Non-inflammatory disorders of ovary, fallopian tube and broad ligament)             | 3737     | 31                | 2790             |
| O99 (Other maternal diseases complicating pregnancy, childbirth and the puerperium)      | 3376     | 141               | 4273             |
| C56 (Malignant neoplasm of ovary)                                                        | 2846     | 0                 | 41               |
| N70 (Salpingitis and oophoritis)                                                         | 2564     | 18                | 2448             |
| O34 (Maternal care for abnormality of pelvic organs)                                     | 2168     | 146               | 1329             |
| C54.1 (Malignant neoplasm of endometrium)                                                | 2158     | 0                 | 8                |
| N73 (Other female pelvic inflammatory diseases)                                          | 1929     | 298               | 2580             |
| O67 (Labor and delivery complicated by intrapartum hemorrhage, not elsewhere classified) | 1164     | 31                | 168              |
| N81 (Female genital prolapse)                                                            | 975      | 0                 | 224              |
| C54.0 (Malignant neoplasm of isthmus uteri)                                              | 865      | 0                 | 2                |
| O45.0 (Premature separation of placenta with coagulation defect)                         | 854      | 298               | 679              |
| C53.0 (Malignant neoplasm of endocervix)                                                 | 801      | 0                 | 7                |
| N97 (Female infertility)                                                                 | 794      | 3                 | 165              |
| N80 (Endometriosis)                                                                      | 759      | 0                 | 866              |
| O44.1 (Complete placenta previa with hemorrhage)                                         | 701      | 98                | 257              |
| N85 (Other non-inflammatory disorders of uterus, except cervix)                          | 653      | 15                | 627              |
| O72 (Postpartum hemorrhage)                                                              | 453      | 777               | 574              |
| D26.0 (Other benign neoplasm of cervix uteri)                                            | 385      | 3                 | 50               |
| C53.1 (Malignant neoplasm of exocervix)                                                  | 343      | 0                 | 1                |
| N71 (Inflammatory disease of uterus, except cervix)                                      | 326      | 7                 | 367              |
| O14 (Pre-eclampsia)                                                                      | 307      | 75                | 349              |
| O85 (Puerperal sepsis)                                                                   | 259      | 32                | 27               |
| O10 (Pre-existing hypertension complicating pregnancy, childbirth and the puerperium)    | 221      | 4                 | 290              |

|                                                                      |     |     |     |
|----------------------------------------------------------------------|-----|-----|-----|
| K65 (Peritonitis)                                                    | 191 | 649 | 778 |
| C50 (Malignant neoplasm of breast)                                   | 187 | 0   | 163 |
| N93 (Other abnormal uterine and vaginal bleeding)                    | 171 | 91  | 522 |
| C54.9 (Malignant neoplasm of corpus uteri, unspecified)              | 155 | 0   | 5   |
| C54.8 (Malignant neoplasm of overlapping sites of corpus uteri)      | 151 | 0   | 2   |
| C18 (Malignant neoplasm of colon )                                   | 142 | 0   | 18  |
| C54.2 Malignant neoplasm of myometrium                               | 141 | 0   | 0   |
| D07 (Carcinoma in situ of other and unspecified genital organs)      | 134 | 0   | 4   |
| O24 (Diabetes mellitus in pregnancy, childbirth, and the puerperium) | 133 | 0   | 56  |

---
